# Supplementary material for: Pyruvic oxime dioxygenase from heterotrophic nitrifier Alcaligenes faecalis is a nonheme Fe(II)-dependent enzyme homologous to class II aldolase
Source: PubMed Central journal article supplement (PMC5216522; doi:10.1038/srep39991), 2017-01-06
Supplement: srep39991-s1.pdf [file srep39991-s1.pdf]

2  
3 **Pyruvic oxime dioxygenase from heterotrophic nitrifier *Alcaligenes faecalis***  
4 **is a nonheme Fe<sup>(II)</sup>-dependent enzyme homologous to class II aldolase**

5  
6 Shuhei Tsujino<sup>1</sup>, Chisato Uematsu<sup>2</sup>, Hideo Dohra<sup>3</sup>, and Taketomo Fujiwara<sup>4\*</sup>

7  
8 <sup>1</sup>Department of Science, Graduate School of Integrated Science and Technology,

9 <sup>2</sup>Department of Biological Sciences, Faculty of Science,

10 <sup>3</sup>Instrumental Research Support Office, Research Institute of Green Science and Technology,

11 <sup>4</sup>Department of Environment and Energy Systems, Graduate School of Science and Technology,

12 Shizuoka University, Shizuoka 422-8529, JAPAN

13  
14  
15 **SUPPLEMENTARY MATERIALS**

16  
17 **Methods**

18  
19 ***Purification of POD***

20 Cultivated *A. faecalis* cells were disrupted two times using an Emulsifies C5 high pressure homogenizer  
21 (Avestin Inc., Ottawa, ON, Canada) at 12,000 psi. The resulting lysate was centrifuged at 12,000×g for 10 min to  
22 remove unbroken cells and debris. The supernatant that showed POD activity was mixed with fine (NH<sub>4</sub>)<sub>2</sub>SO<sub>4</sub>  
23 crystals to 30% saturation. After gentle stirring on ice for 30 min, the solution was centrifuged at 12,000×g for 10  
24 min to remove precipitate. The supernatant was further mixed with (NH<sub>4</sub>)<sub>2</sub>SO<sub>4</sub> to 70% saturation, then was  
25 centrifuged again under the same condition. The precipitant obtained was suspended in 50 mL of 10 mM HEPES  
26 buffer (pH 7.0) (buffer B). After dialysis against buffer B, the sample was applied to an anion-exchange  
27 chromatography column (2×10 cm) of DEAE-Toyopearl 650M gel (Tosoh) that had been equilibrated with buffer  
28 B. The proteins adsorbed on the column were eluted by a linear gradient generated from 100 mL each of the buffer  
29 B and the buffer B containing 0.3 M NaCl. The fractions that showed POD activity were collected, and  
30 precipitated by 30%-60% saturated (NH<sub>4</sub>)<sub>2</sub>SO<sub>4</sub> fractionation. The pelleted material obtained was suspended in a  
31 minimal volume of 10 mM Tris-HCl buffer (pH 8.0) (buffer C), then applied to a column (2×15 cm) of Sepharose  
32 CL-4B (GE Healthcare) that had been equilibrated with the buffer C containing 60% saturated (NH<sub>4</sub>)<sub>2</sub>SO<sub>4</sub>. The  
33 proteins adsorbed on the column were eluted with a linear gradient generated from 200 mL each of the buffer C  
34 containing 60% saturated (NH<sub>4</sub>)<sub>2</sub>SO<sub>4</sub> and the buffer C. The POD typically eluted in the fraction containing about  
35 30% saturated (NH<sub>4</sub>)<sub>2</sub>SO<sub>4</sub>. The fractions showing enzymatic activity were corrected, dialyzed against the buffer C,  
36 concentrated using concentrated using a Microcon YM-30 (Millipore), and used for the experiments.

37  
38 ***Determination of draft genome sequence of A. faecalis***

39 The genomic DNA of *A. faecalis* was isolated using a DNeasy blood and tissue kit (Qiagen, Hilden,  
40 Germany) and fragmented using the Covaris Acoustic Solubilizer. A paired-end library (2 × 301 bp) constructed

41 by the TruSeq DNA PCR-Free Library Preparation Kit (Illumina) was sequenced using the Illumina MiSeq  
42 platform at the Instrumental Research Support Office, Research Institute of Green Science and Technology,  
43 Shizuoka University. The raw read sequences were cleaned up using Trimmomatic<sup>1</sup> by trimming adapter  
44 sequences and low-quality ends (quality score, <15) and khmer<sup>2</sup> by filtering the reads with a low k-mer coverage  
45 (<5) to remove sequencing errors and contamination sequences. The resultant 1,251,216 high-quality reads  
46 totaling 327.16 Mb, which corresponds to an approximately 81-fold coverage of the genome, were assembled  
47 using SPAdes version 3.8.0<sup>3</sup> with k-mer sizes of 21, 33, 55, 77, 99, and 127 bp with options (--careful, --only-  
48 assembler, and --cov-cutoff auto), and contigs less than 200-bp were eliminated. The sequence data have been  
49 archived at DDBJ Sequence Read Archive (DRA) under the accession no. DRA005070.

50

- 51 1. Bolger, A. M., Lohse, M. & Usadel, B. Trimmomatic: a flexible trimmer for Illumina sequence data.  
52 *Bioinformatics* **30**, 2114-2120 (2014).
- 53  
54 2. Crusoe, M. R., *et al.* The khmer software package: enabling efficient nucleotide sequence analysis. F1000Res  
55 **4**, 900 (2015) 10.12688/f1000research.6924.1.
- 56  
57 3. Bankevich, A., *et al.* SPAdes: a new genome assembly algorithm and its applications to single-cell  
58 sequencing. *J. Comput. Biol.* **19**, 455-477 (2012) 10.1089/cmb.2012.0021

59

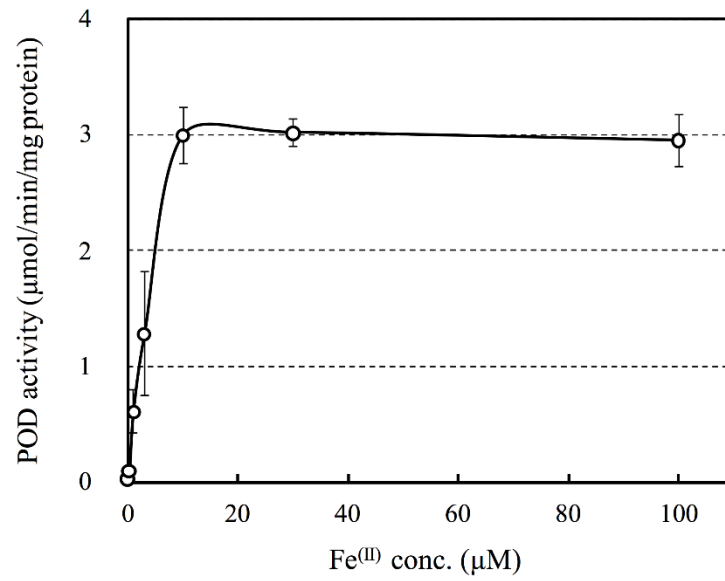

61

62 **Supplementary Figure S1. Fe<sup>II</sup>-dependent activation of rPOD.** The rPOD inactivated by EDTA-treatment was  
63 reactivated as described in Materials and Methods. POD activity was measured in the assay solution containing  
64 several concentrations of FeSO<sub>4</sub>. Experiments were performed independently for three times. Error bars represent  
65 S.E.

66

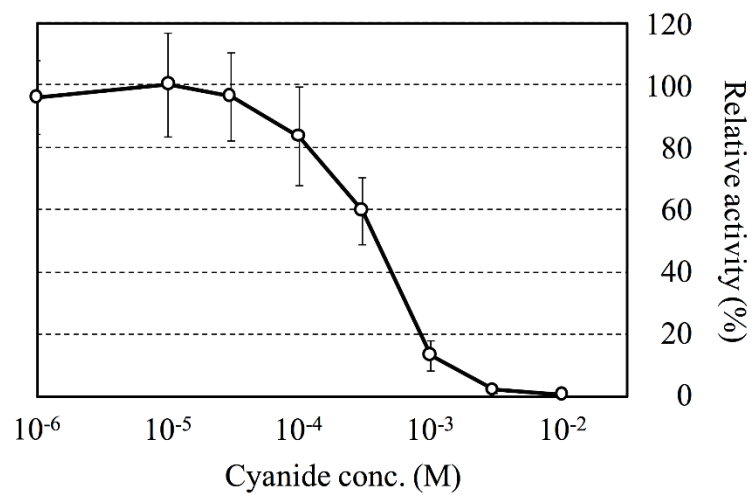

67

68 **Supplementary Figure S2. Inhibition of POD activity by cyanide.** Inhibitory effect of cyanide on the activity of  
69 the rPOD which was reconstituted by Fe<sup>(II)</sup> was measured as mentioned in Materials and Methods. Experiments  
70 were performed independently for three times. Error bars represent S.E.
